# Supplementary figures and images for: Environmental Temperature Controls Accumulation of Transacting siRNAs Involved in Heterochromatin Formation
Source: MDPI journal article supplement (doi:10.3390/genes9020117), 2018-02-21

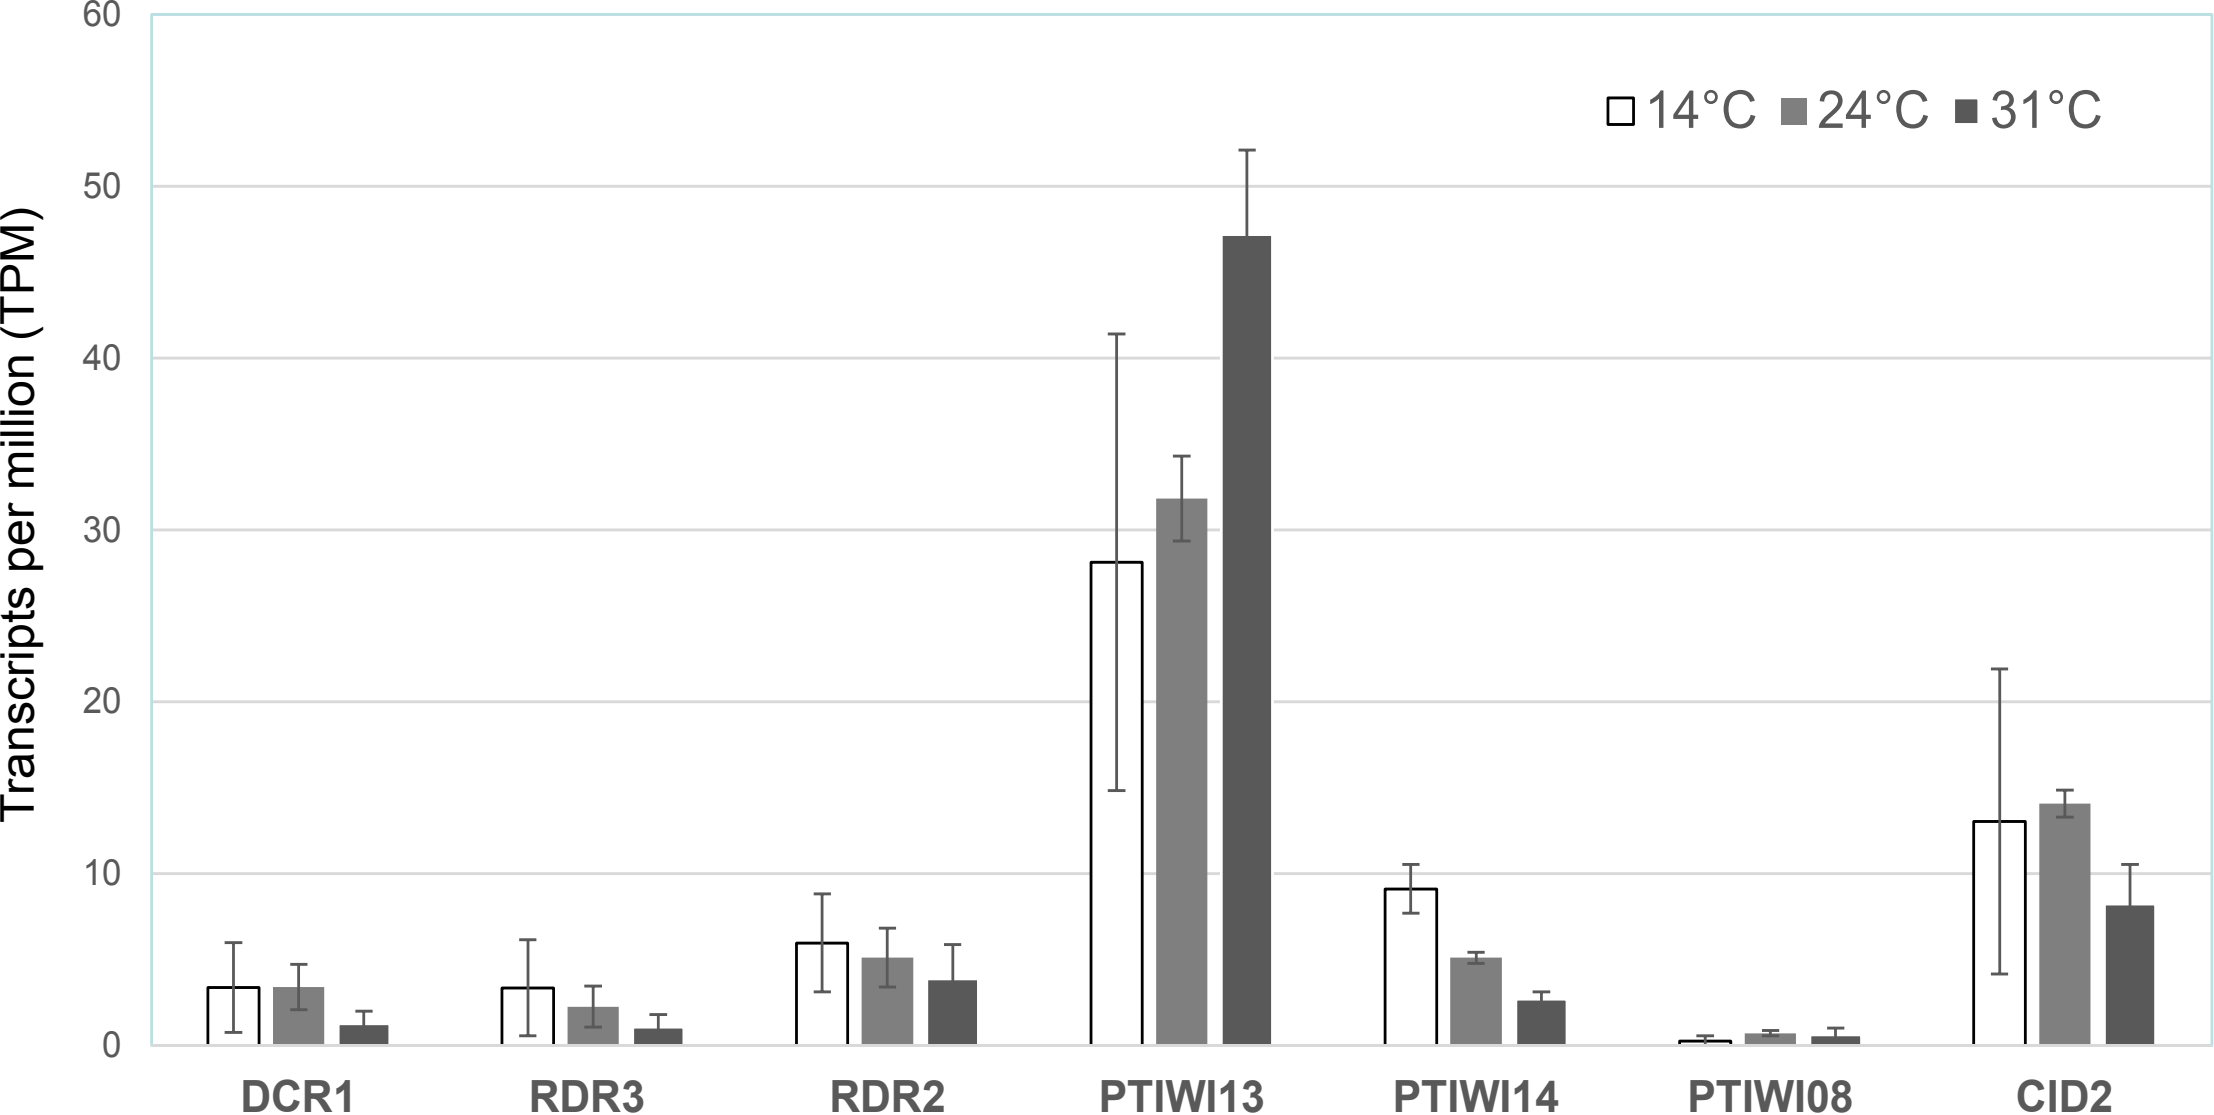

Supplement: s1 [file s1]

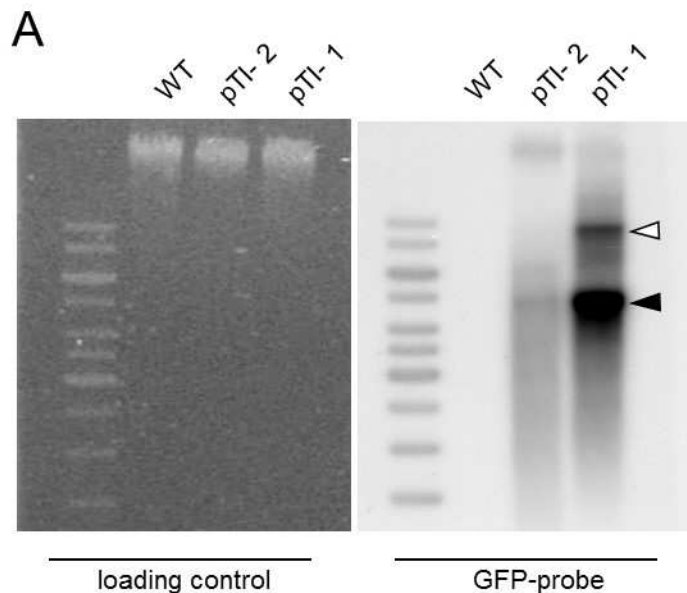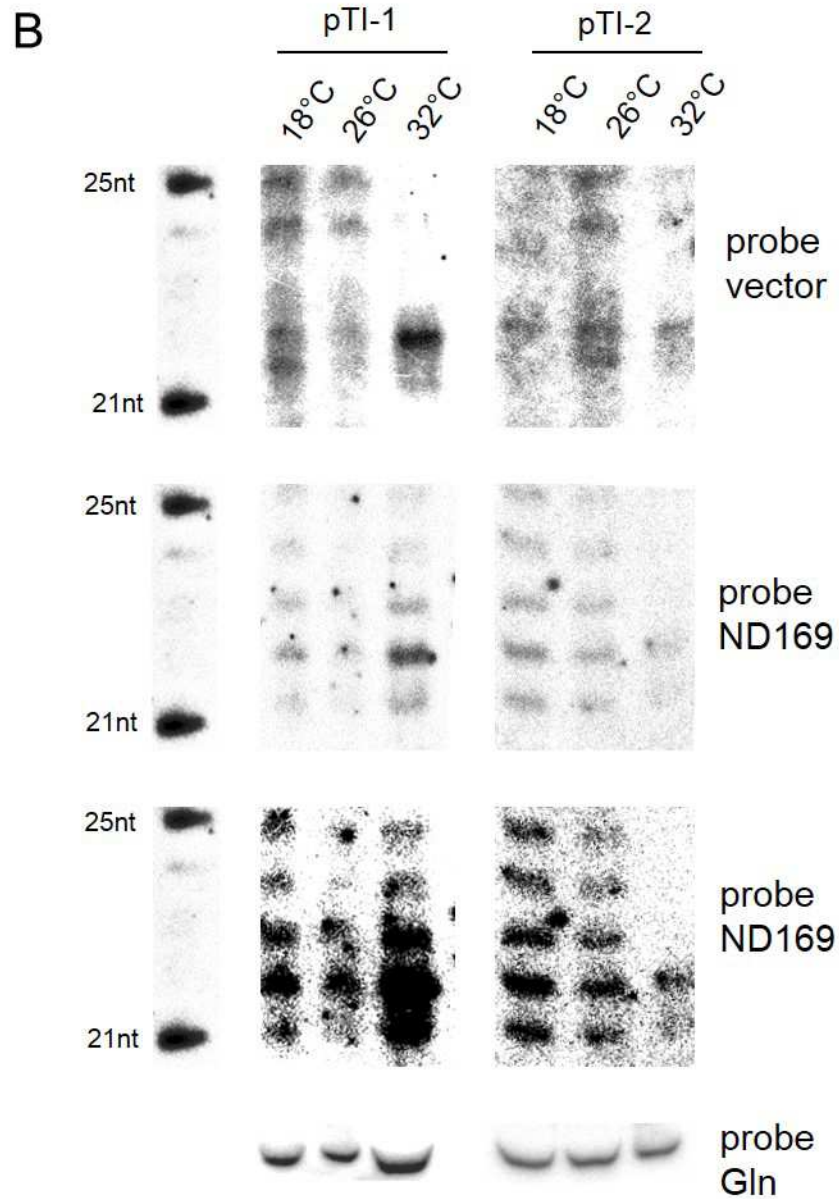

Supplement: s1 [file s1]
